# Supplementary material for: Network analysis of EMT and MET micro-RNA regulation in breast cancer
Source: PubMed Central journal article supplement (PMC5648819; doi:10.1038/s41598-017-13903-1), 2017-10-19
Supplement: 41598_2017_13903_MOESM1_ESM.pdf [file 41598_2017_13903_MOESM1_ESM.pdf]

# **Network Analysis of EMT and MET micro-RNA Regulation in Breast Cancer**

**Diana Drago-García<sup>1</sup>, Jesús Espinal-Enríquez<sup>1,2</sup>, and Enrique Hernández-Lemus<sup>1,2,\*</sup>**

<sup>1</sup>Computational Genomics Division, National Institute of Genomic Medicine (INMEGEN), 14610, México

<sup>2</sup>Centro de Ciencias de la Complejidad, Universidad Nacional Autónoma de México (UNAM), 04510 México

\*ehernandez@inmegen.gob.mx

## **Supplementary Information**

## Supplementary Information Index

### Supplementary Tables

|            |                                                                                 |                           |               |
|------------|---------------------------------------------------------------------------------|---------------------------|---------------|
| Table S 1  | Network attributes                                                              | Supplementary information | page 3        |
| Table S 2  | Top enrichment results for tumour and control networks                          | Supplementary information | page 7        |
| Table S 3  | Control data GO enrichment results                                              | xml format                | Table_S3.xml  |
| Table S 4  | Tumour data GO enrichment results                                               | xml format                | Table_S4.xml  |
| Table S 5  | Top ten high-degree nodes in tumour and control networks                        | Supplementary information | page 7        |
| Table S 6  | miR-200 family members degree in first neighbour networks                       | Supplementary information | page 8        |
| Table S 7  | Control data miR-200 subnetwork GO enrichment results                           | xml format                | Table_S7.xml  |
| Table S 8  | Tumour data miR-200 subnetwork GO enrichment results                            | xml format                | Table_S8.xml  |
| Table S 9  | miR-199 family members degree in first neighbour networks                       | Supplementary information | page 8        |
| Table S 10 | Tumour data miR-199 subnetwork GO enrichment results                            | xml format                | Table_S10.xml |
| Table S 11 | Pathway deregulation score matrix: DLK1-DIO3 genes analysis (Reactome)          | xml format                | Table_S11.xml |
| Table S 12 | Pathway deregulation score matrix: DLK1-DIO3 genes analysis (WikiPathways)      | xml format                | Table_S12.xml |
| Table S 13 | Pathway deregulation score matrix: DLK1-DIO3 genes analysis (KEGG)              | xml format                | Table_S13.xml |
| Table S 14 | Pathway deregulation score matrix: miR-200 genes analysis (Reactome)            | xml format                | Table_S14.xml |
| Table S 15 | Pathway deregulation score matrix: miR-200 genes analysis (Wikipathways)        | xml format                | Table_S15.xml |
| Table S 16 | Pathway deregulation score matrix: miR-200 genes analysis (KEGG)                | xml format                | Table_S16.xml |
| Table S 17 | Validated and predicted miR-mRNA associations (Full network results)            | Supplementary information | page 19       |
| Table S 18 | Validated and predicted miR-mRNA associations (miR-200 subnetwork results)      | Supplementary information | page 19       |
| Table S 19 | miRTarVis matching edges with inferred network results (DLK1-DIO3 associations) | xml format                | Table_S19.xml |
| Table S 20 | miRTarVis matching edges with inferred network results (miR-199 associations)   | xml format                | Table_S20.xml |
| Table S 21 | Variation on networks p-value threshold: network attributes                     | Supplementary information | page 21       |
| Table S 22 |                                                                                 | Supplementary information | page 21       |
| Table S 23 |                                                                                 | Supplementary information | page 22       |
| Table S 24 |                                                                                 | Supplementary information | page 22       |
| Table S 25 | Variation on networks p-value threshold: top ten high-degree nodes              | Supplementary information | page 22       |
| Table S 26 |                                                                                 | Supplementary information | page 23       |
| Table S 27 |                                                                                 | Supplementary information | page 23       |
| Table S 28 |                                                                                 | Supplementary information | page 23       |

### Supplementary Figures

|             |                                                                                            |                           |         |
|-------------|--------------------------------------------------------------------------------------------|---------------------------|---------|
| Figure S 1  | Tumour and control networks MI distribution Q-Q plot                                       | Supplementary information | page 3  |
| Figure S 2  | Whole network visualization: Control data                                                  | Supplementary information | page 5  |
| Figure S 3  | Whole network visualization: Tumour data                                                   | Supplementary information | page 6  |
| Figure S 4  | DLK1-DIO3 miRs network visualization: Tumour data                                          | Supplementary information | page 9  |
| Figure S 5  | Pathway deregulation score heatmap: DLK1-DIO3 genes analysis (Reactome)                    | Supplementary information | page 10 |
| Figure S 6  | Pathway deregulation score heatmap: DLK1-DIO3 genes analysis (WikiPathways)                | Supplementary information | page 11 |
| Figure S 7  | Pathway deregulation score heatmap: DLK1-DIO3 genes analysis (KEGG)                        | Supplementary information | page 12 |
| Figure S 8  | Pathway deregulation score heatmap: miR-200 genes analysis (Reactome)                      | Supplementary information | page 13 |
| Figure S 9  | Pathway deregulation score heatmap: miR-200 genes analysis (Wikipathways)                  | Supplementary information | page 14 |
| Figure S 10 | Pathway deregulation score heatmap: miR-200 genes analysis (KEGG)                          | Supplementary information | page 15 |
| Figure S 11 | Network visualization: TGF-beta receptor signaling in EMT (Reactome)                       | Supplementary information | page 16 |
| Figure S 12 | Network visualization: TGF-beta signaling (KEGG)                                           | Supplementary information | page 17 |
| Figure S 13 | Network visualization: TGF-beta receptor signaling in thyroid cells for EMT (WikiPathways) | Supplementary information | page 18 |
| Figure S 14 | Network visualization: TargetScan and miRTarBase matching edges with inferred networks     | Supplementary information | page 20 |

### Supplementary Methods

|                                                                         |                           |         |
|-------------------------------------------------------------------------|---------------------------|---------|
| Network construction: variation on network's p-value threshold strategy | Supplementary information | page 21 |
|-------------------------------------------------------------------------|---------------------------|---------|

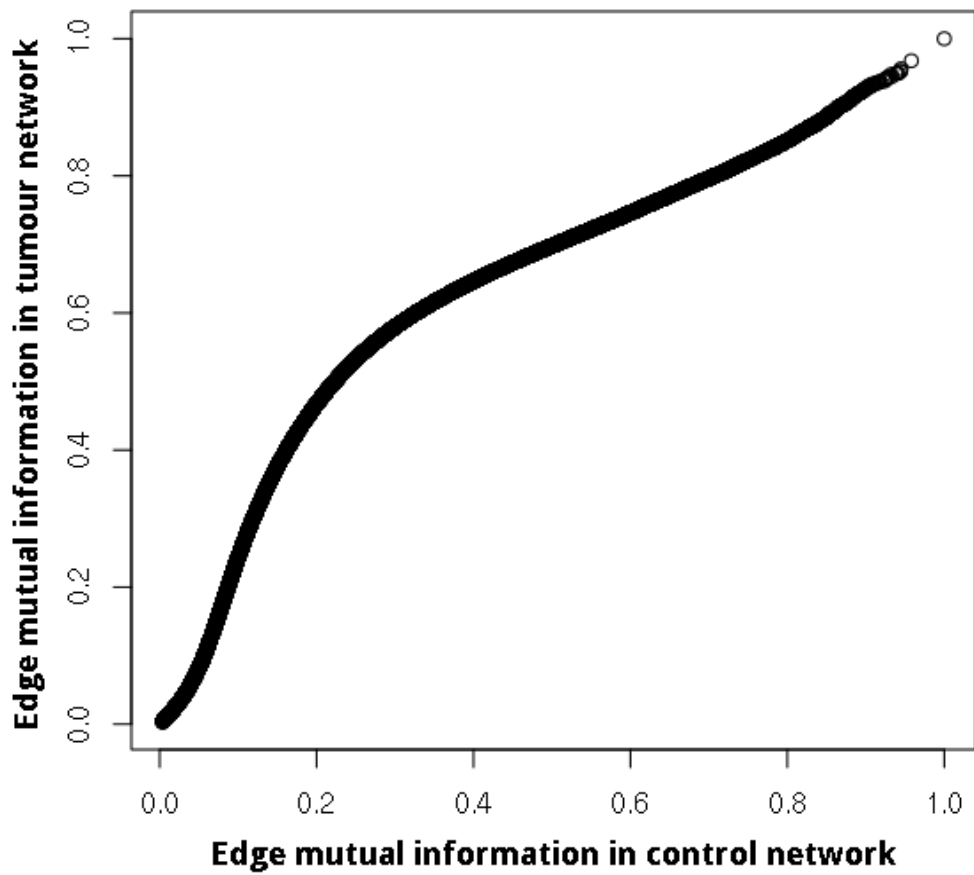

**Figure S1.** Q-Q plot of the whole set of MI interactions for networks inferred from tumour and control data.

Table S1. Attributes of the Networks inferred from control and tumour data (Lc: Largest Component).

| Attribute    | Whole network |        | Largest component |        | Lc mRNA-mRNA subnetwork |        |
|--------------|---------------|--------|-------------------|--------|-------------------------|--------|
|              | Control       | Tumour | Control           | Tumour | Control                 | Tumour |
| Total nodes  | 4,575         | 4,602  | 4,229             | 4,200  | 4,096                   | 3,714  |
| miR          | 241           | 514    | 133               | 486    | 0                       | 0      |
| mRNA         | 4,334         | 4,088  | 4,096             | 3,714  | 4,096                   | 3,714  |
| Total edges  | 33,879        | 29,186 | 33,388            | 28,913 | 14,486                  | 11,010 |
| miR-miR      | 482           | 1,775  | 240               | 1,769  | 0                       | 0      |
| mRNA-miR     | 18,760        | 16,173 | 18,662            | 16,134 | 0                       | 0      |
| mRNA-mRNA    | 14,637        | 11,238 | 14,486            | 11,010 | 14,486                  | 11,010 |
| Components   | 102           | 165    | 1                 | 1      | 1,856                   | 2,590  |
| Single nodes | 0             | 0      | 0                 | 0      | 1,814                   | 2,524  |



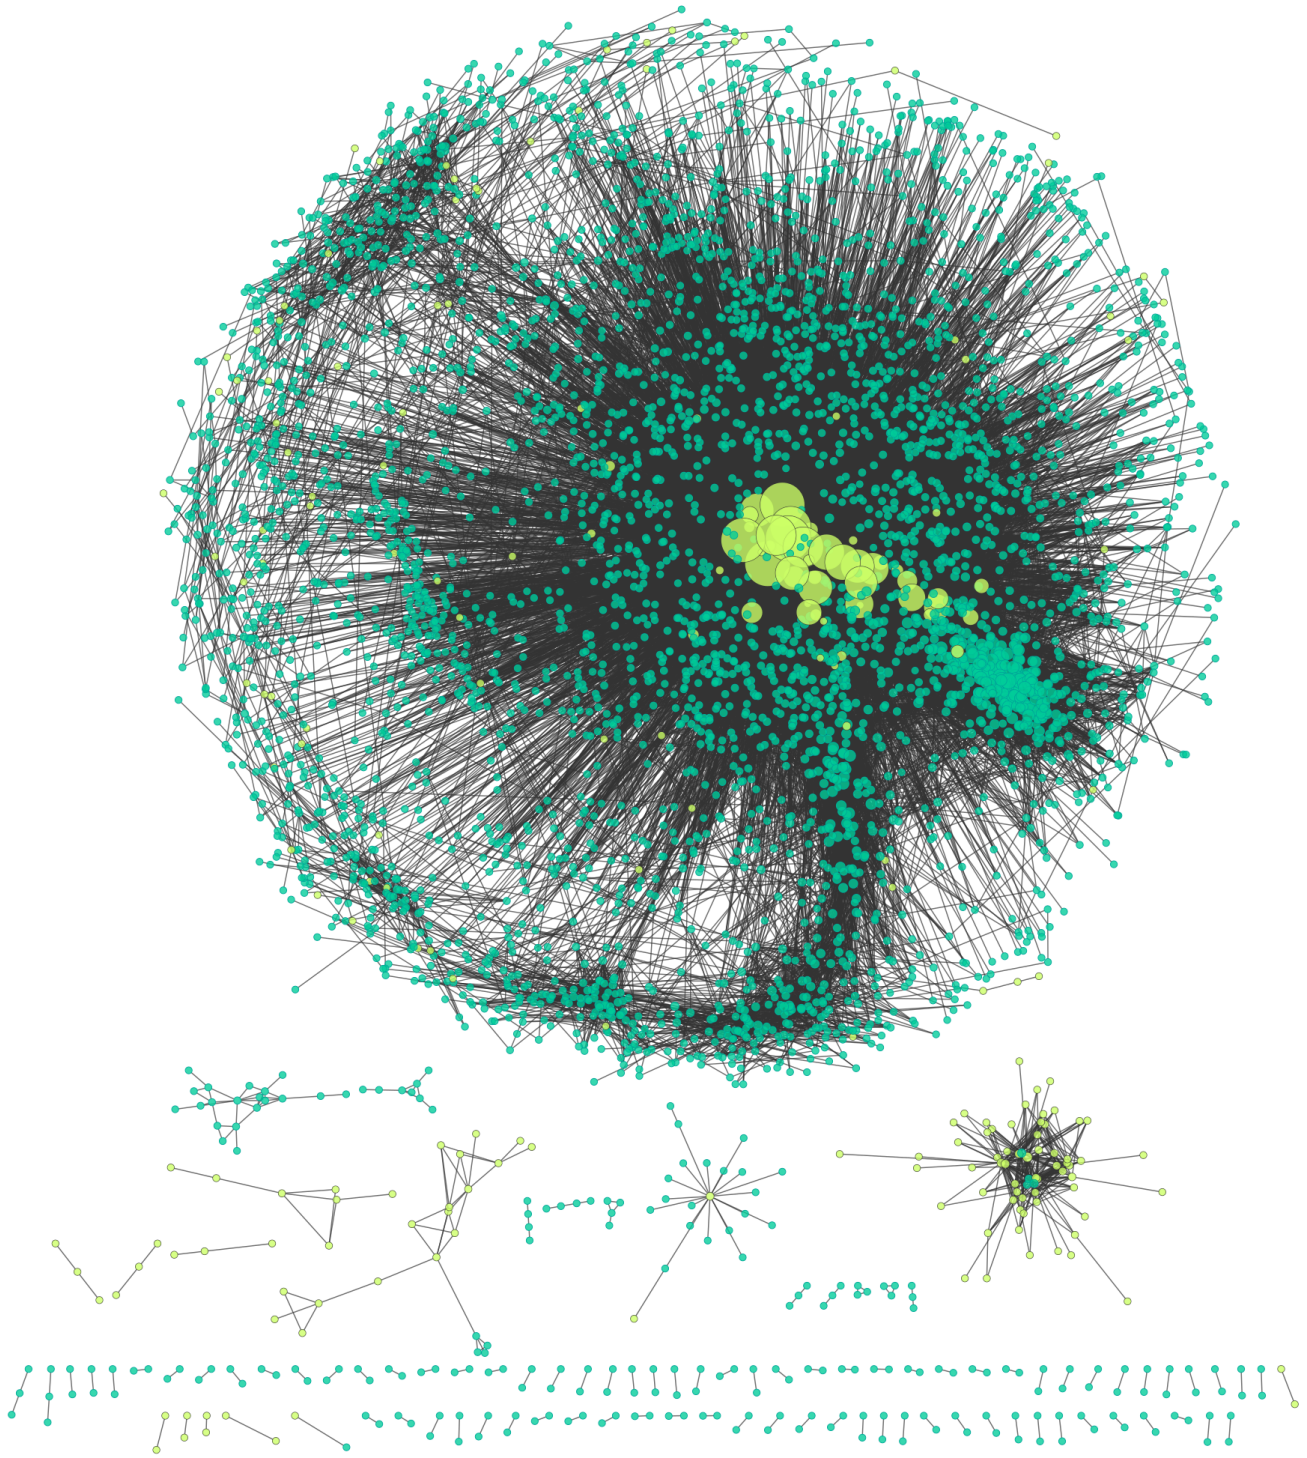

**Figure S2.** Spring embedded visualization of the whole network inferred from control data. In this figure miRs are represented as green nodes, and mRNAs as turquoise nodes.

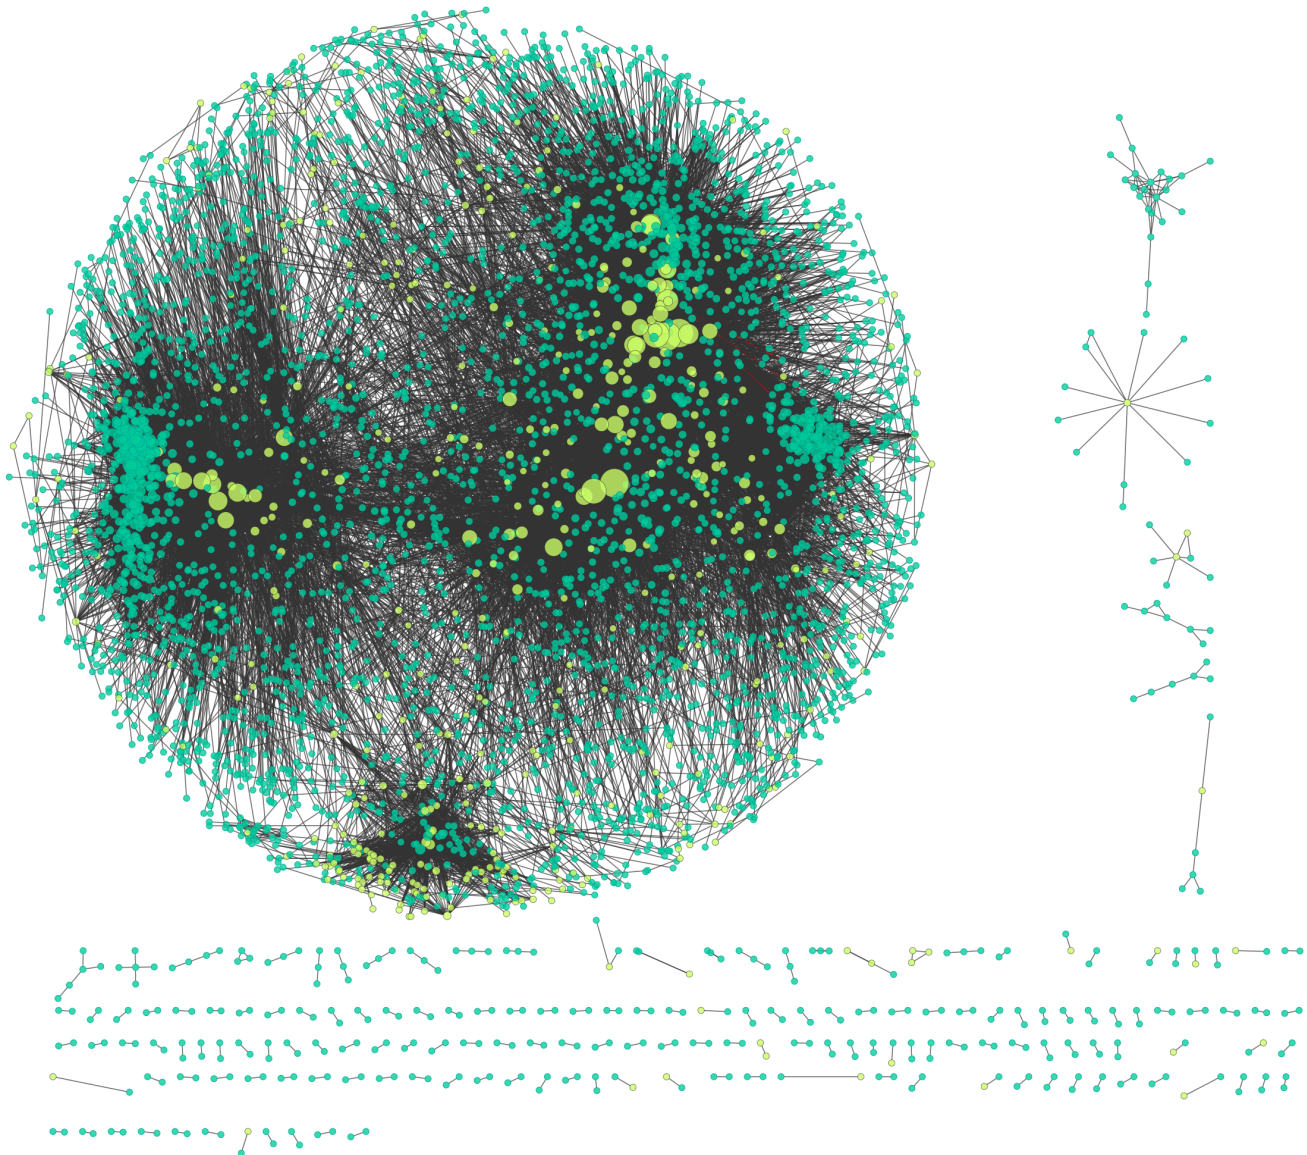

**Figure S3.** Spring embedded visualization of the whole network inferred from tumour data. In this figure miRs are represented as green nodes, and mRNAs as turquoise nodes.

Table S2. Enrichment analysis top results for tumours and controls networks. The left column shows the Gene Ontology categories and their respective enriched terms, meanwhile the right column contains the related statistical significance (FDR: False Discovery Rate, Benjamini-Hochberg corrected  $p$ -value  $< 0.01$ ).

| <b>Controls</b>                                                 |                          | <b>Tumours</b>                              |                          |
|-----------------------------------------------------------------|--------------------------|---------------------------------------------|--------------------------|
|                                                                 | FDR                      |                                             | FDR                      |
| <b>Biological process</b>                                       |                          | <b>Biological process</b>                   |                          |
| Translational elongation                                        | $5.4716 \times 10^{-19}$ | Immune system process                       | $1.3985 \times 10^{-56}$ |
| Phosphorylation                                                 | $7.5397 \times 10^{-6}$  | Immune response                             | $1.9804 \times 10^{-44}$ |
| rRNA transcription                                              | $1.0708 \times 10^{-4}$  | Regulation of immune system process         | $4.0949 \times 10^{-44}$ |
| Oxidation reduction                                             | $1.4061 \times 10^{-4}$  | Cell adhesion                               | $2.0828 \times 10^{-37}$ |
| Protein amino acid phosphorylation                              | $1.4996 \times 10^{-4}$  | Biological adhesion                         | $2.4522 \times 10^{-37}$ |
| <b>Molecular function</b>                                       |                          | <b>Molecular function</b>                   |                          |
| Transferase activity, transferring phosphorus-containing groups | $6.2019 \times 10^{-11}$ | Cytokine binding                            | $6.3558 \times 10^{-16}$ |
| Kinase activity                                                 | $3.2346 \times 10^{-10}$ | Carbohydrate binding structural constituent | $1.8109 \times 10^{-13}$ |
| Phosphotransferase activity, alcohol group as acceptor          | $6.1591 \times 10^{-8}$  | Polysaccharide binding                      | $2.2194 \times 10^{-13}$ |
| Enzyme binding                                                  | $2.3155 \times 10^{-7}$  | Pattern binding                             | $2.2194 \times 10^{-13}$ |
| GTPase regulator activity                                       | $9.8384 \times 10^{-7}$  | Glycosaminoglycan binding                   | $2.8339 \times 10^{-13}$ |
| <b>Cellular component</b>                                       |                          | <b>Cellular component</b>                   |                          |
| Cytosolic ribosome                                              | $4.2300 \times 10^{-20}$ | Extracellular region part                   | $7.3601 \times 10^{-50}$ |
| Cell-cell junction                                              | $1.1648 \times 10^{-11}$ | Extracellular matrix                        | $3.3204 \times 10^{-36}$ |
| Cytosolic part                                                  | $6.2019 \times 10^{-11}$ | Proteinaceous extracellular matrix          | $6.5129 \times 10^{-34}$ |
| Ribosomal subunit                                               | $1.2319 \times 10^{-9}$  | Extracellular space                         | $5.3344 \times 10^{-31}$ |
| Cytosolic small ribosomal subunit                               | $1.5364 \times 10^{-9}$  | Extracellular matrix part                   | $1.7167 \times 10^{-16}$ |

Table S5. Top ten high degree nodes in networks inferred from control and tumour data.

| <b>Control</b>  |        | <b>Tumour</b>   |        |
|-----------------|--------|-----------------|--------|
| Node            | Degree | Node            | Degree |
| hsa-mir-200b-3p | 1,445  | hsa-let-7c-5p   | 509    |
| hsa-mir-200a-3p | 1,437  | hsa-mir-199a-5p | 500    |
| hsa-mir-141-5p  | 1,392  | hsa-mir-199b-5p | 498    |
| hsa-mir-141-3p  | 1,363  | hsa-mir-337-3p  | 446    |
| hsa-mir-200a-5p | 1,135  | hsa-mir-99a-5p  | 419    |
| hsa-mir-200c-3p | 1,106  | hsa-mir-134-5p  | 342    |
| hsa-mir-193b-5p | 1,086  | hsa-mir-199a-3p | 319    |
| hsa-mir-652-3p  | 770    | hsa-mir-199b-3p | 318    |
| hsa-mir-22-3p   | 769    | hsa-mir-382-5p  | 311    |
| hsa-mir-378a-5p | 631    | hsa-mir-223-3p  | 285    |

Table S6. mir-200 family miRs degree in the first neighbour networks inferred from control and tumour data.

| miR             | Control | Tumour |
|-----------------|---------|--------|
|                 | Degree  |        |
| hsa-mir-200a-3p | 1,437   | 16     |
| hsa-mir-200a-5p | 1,135   | 2      |
| hsa-mir-200b-3p | 1,445   | 18     |
| hsa-mir-200b-5p | 291     | 17     |
| hsa-mir-200c-3p | 1,106   | 53     |
| hsa-mir-200c-5p | 641     | 7      |
| hsa-mir-141-5p  | 1,392   | 5      |
| hsa-mir-141-3p  | 1,363   | 181    |
| hsa-mir-429     | 367     | 4      |

Table S9. mir-199 family miRs degree the in first neighbour networks inferred from control and tumour data.

| miR             | Control | Tumour |
|-----------------|---------|--------|
|                 | Degree  |        |
| hsa-mir-199a-5p |         | 500    |
| hsa-mir-199a-3p | 1       | 319    |
| hsa-mir-199b-5p |         | 498    |
| hsa-mir-199b-3p | 1       | 318    |



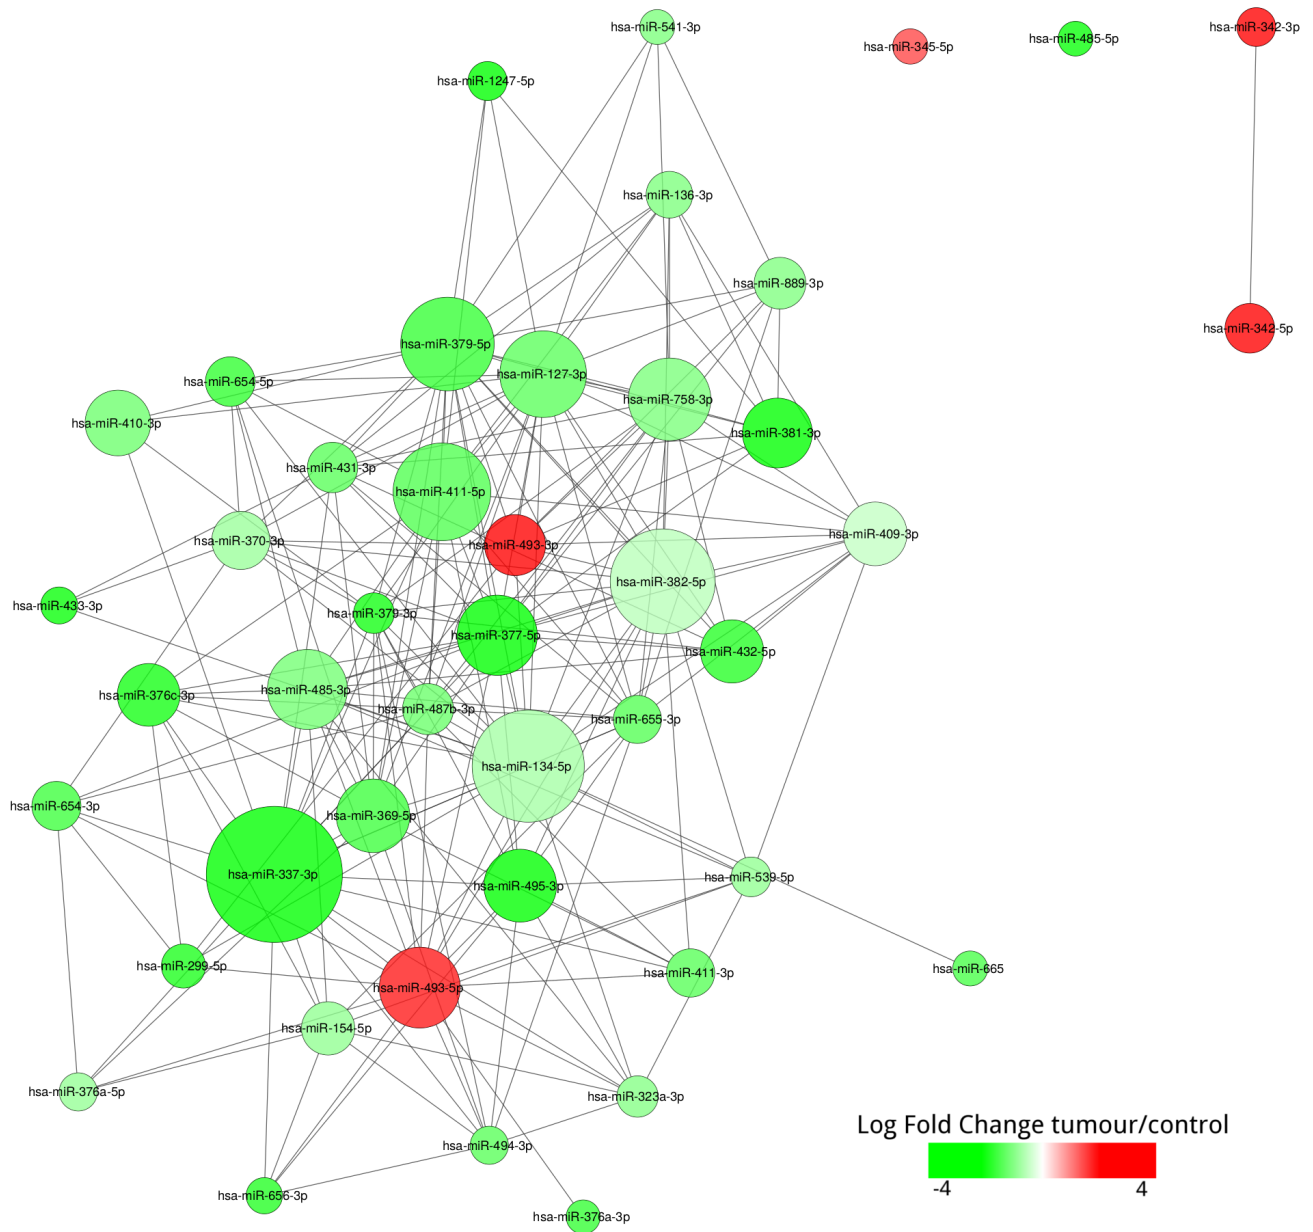

**Figure S4.** Differential expression for miRs from DLK1-DIO3 region (tumour data network). It should be noted that the majority of miRs are underexpressed.

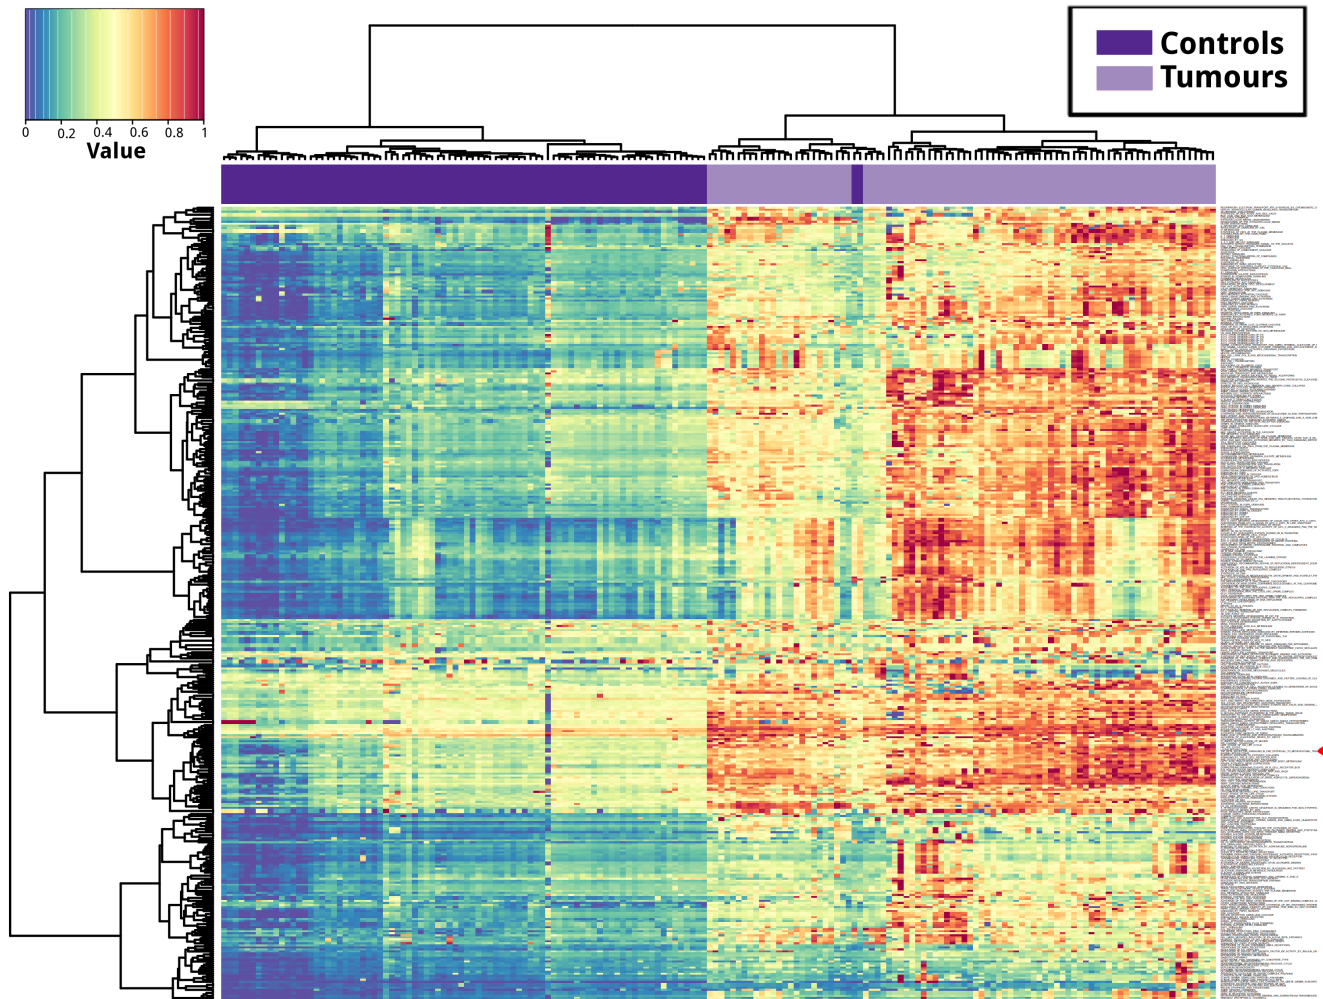

**Figure S5.** Pathway Deregulation Score heatmap for the Reactome pathways that contained a least a gene involved in first neighbours associations with the miRs in the DLK1-DIO3 cluster in our network inferred from tumours data. In this figure samples are represented as columns and the pathways included in the analysis as rows. The figure contains the Pathway Deregulation Scores (PDS) obtained for 393 Reactome pathways for 172 samples (86 tumour samples and 86 matching control samples) coloured according to the color code at the top left of the figure. Which means that blue-green pathways are slightly deregulated, and orange ones are strongly deregulated. Blue and Red bars at the top of the heatmap represent control and tumour samples, respectively. Euclidean distances and the Ward hierarchical clustering method were used for the dendrogram. The red arrow points the pathway: TGF-beta receptor signalling in EMT (epithelial to mesenchymal transition).

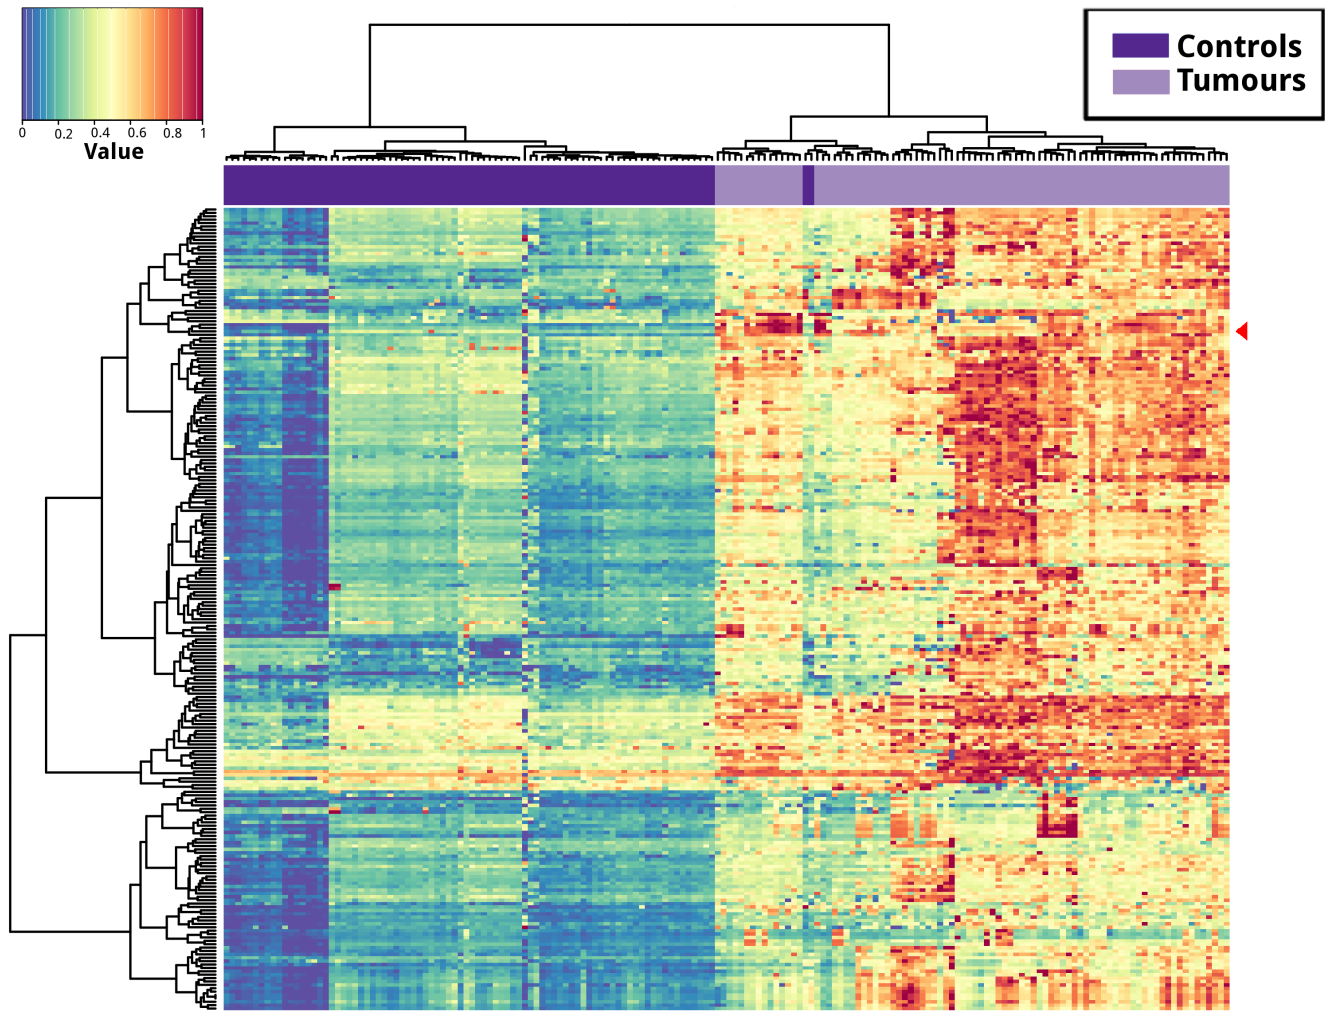

**Figure S6.** Pathway Deregulation Score heatmap for the WikiPathways pathways that contained a least a gene involved in first neighbours associations with the miRNAs in the DLK1-DIO3 cluster in our network inferred from tumours data. In this figure samples are represented as columns and the pathways included in the analysis as rows. The figure contains the Pathway Deregulation Scores (PDS) obtained for 237 WikiPathways pathways for 172 samples (86 tumour samples and 86 matching control samples) coloured according to the color code at the top left of the figure. Which means that blue-green pathways are slightly deregulated, and orange ones are strongly deregulated. Blue and Red bars at the top of the heatmap represent control and tumour samples, respectively. Euclidean distances and the Ward hierarchical clustering method were used for the dendrogram. The red arrow points the pathway: TGF-B Signaling in Thyroid Cells for Epithelial-Mesenchymal Transition.

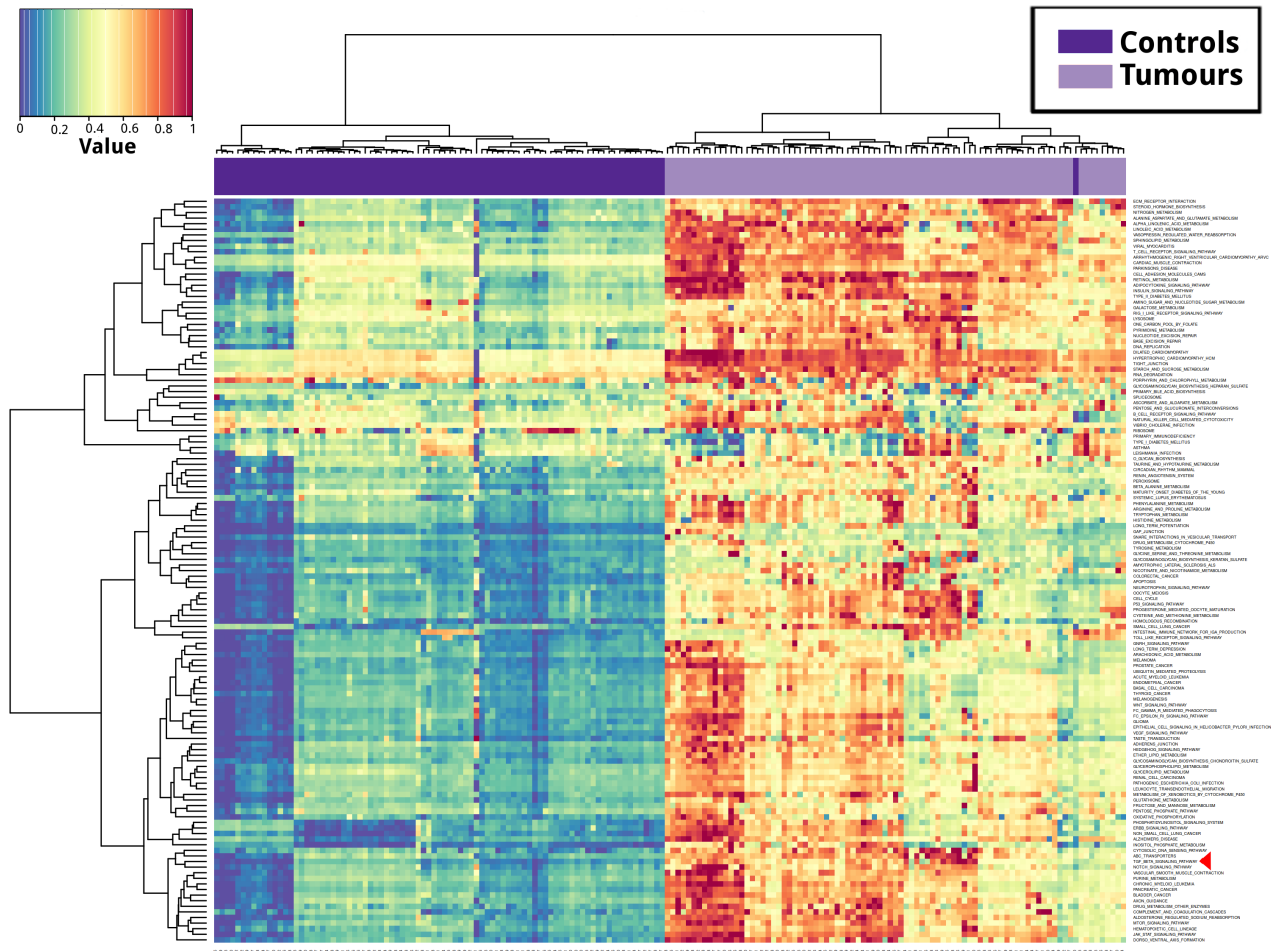

**Figure S7.** Pathway Deregulation Score heatmap for the KEGG pathways that contained a least a gene involved in first neighbours associations with the miRNAs in the DLK1-DIO3 cluster in our network inferred from tumours data. In this figure samples are represented as columns and the pathways included in the analysis as rows. The figure contains the Pathway Deregulation Scores (PDS) obtained for 133 KEGG pathways for 172 samples (86 tumour samples and 86 matching control samples) coloured according to the color code at the top left of the figure. Which means that blue-green pathways are slightly deregulated, and orange ones are strongly deregulated. Blue and Red bars at the top of the heatmap represent control and tumour samples, respectively. Euclidean distances and the Ward hierarchical clustering method were used for the dendrogram. The red arrow points the pathway: TGF-beta signaling.



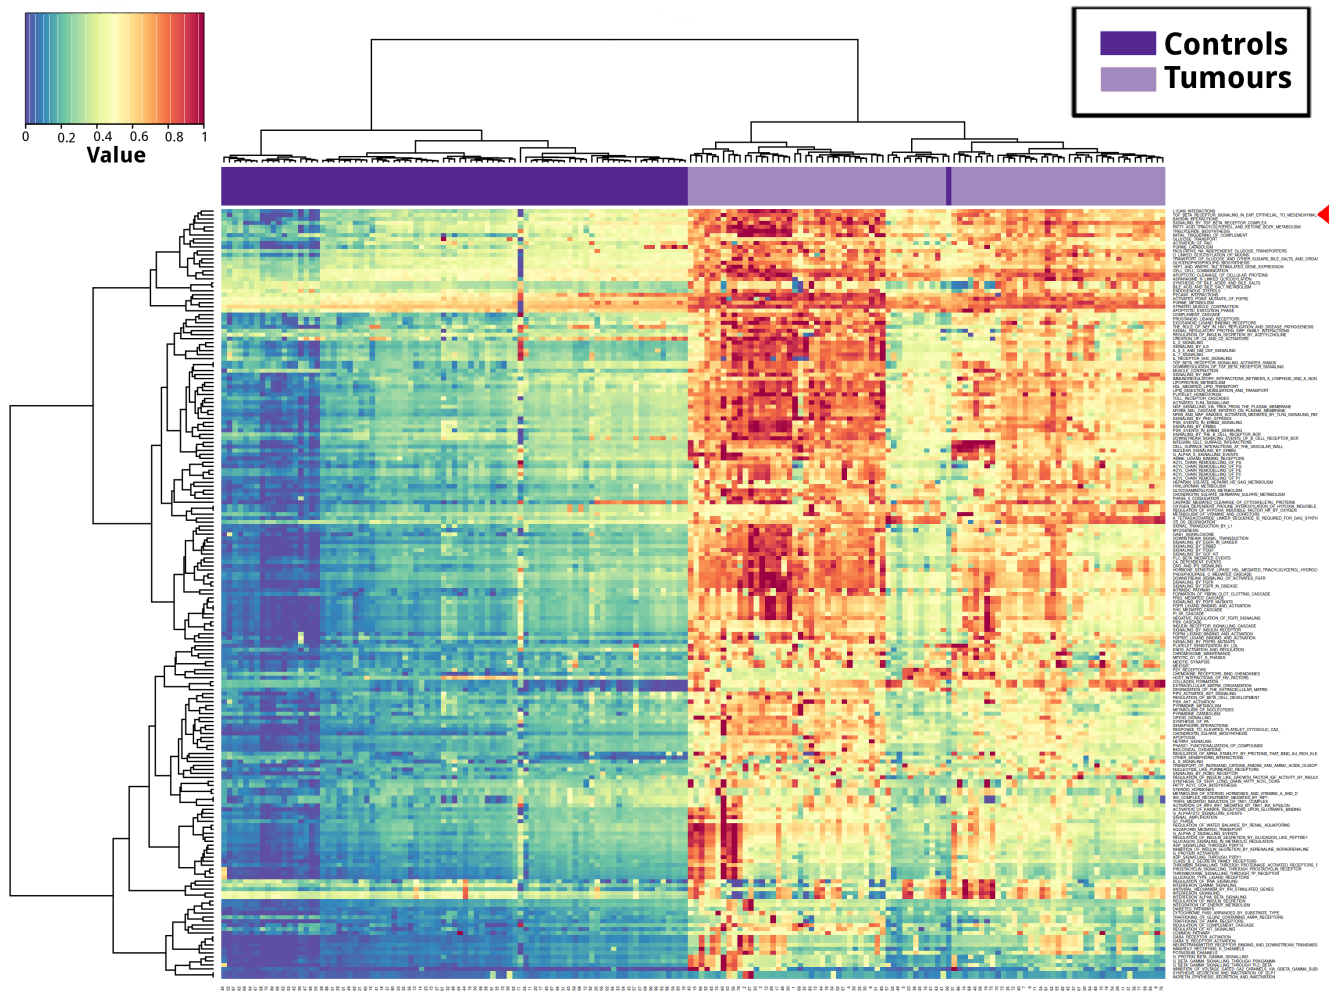

**Figure S8.** Pathway Deregulation Score heatmap for the Reactome pathways that contained a least a gene involved in first neighbours associations with the miR-200 family in our network inferred from tumours data. In this figure samples are represented as columns and the pathways included in the analysis as rows. The figure contains the Pathway Deregulation Scores (PDS) obtained for 193 Reactome pathways for 172 samples (86 tumour samples and 86 matching control samples) coloured according to the color code at the top left of the figure. Which means that blue-green pathways are slightly deregulated, and orange ones are strongly deregulated. Blue and Red bars at the top of the heatmap represent control and tumour samples, respectively. Euclidean distances and the Ward hierarchical clustering method were used for the dendrogram. The red arrow points the pathway: TGF-beta receptor signaling in EMT (epithelial to mesenchymal transition).

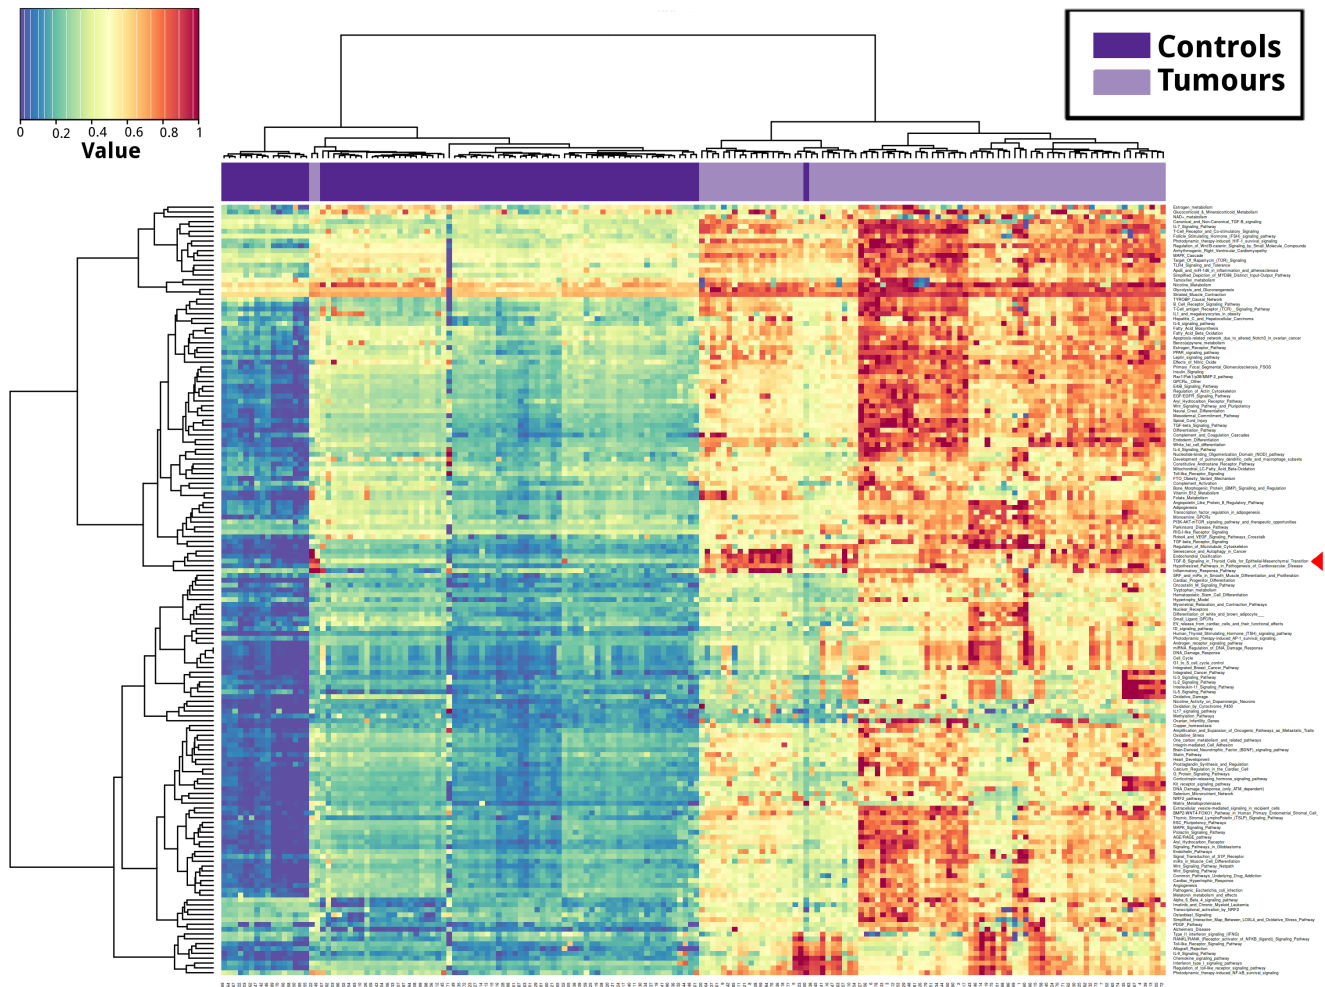

**Figure S9.** Pathway Deregulation Score heatmap for the WikiPathways pathways that contained a least a gene involved in first neighbours associations with the miR-200 family in our network inferred from tumours data. In this figure samples are represented as columns and the pathways included in the analysis as rows. The figure contains the Pathway Deregulation Scores (PDS) obtained for 159 WikiPathways pathways for 172 samples (86 tumour samples and 86 matching control samples) coloured according to the color code at the top left of the figure. Which means that blue-green pathways are slightly deregulated, and orange ones are strongly deregulated. Blue and Red bars at the top of the heatmap represent control and tumour samples, respectively. Euclidean distances and the Ward hierarchical clustering method were used for the dendrogram. The red arrow points the pathway: TGF-B Signaling in Thyroid Cells for Epithelial-Mesenchymal Transition.



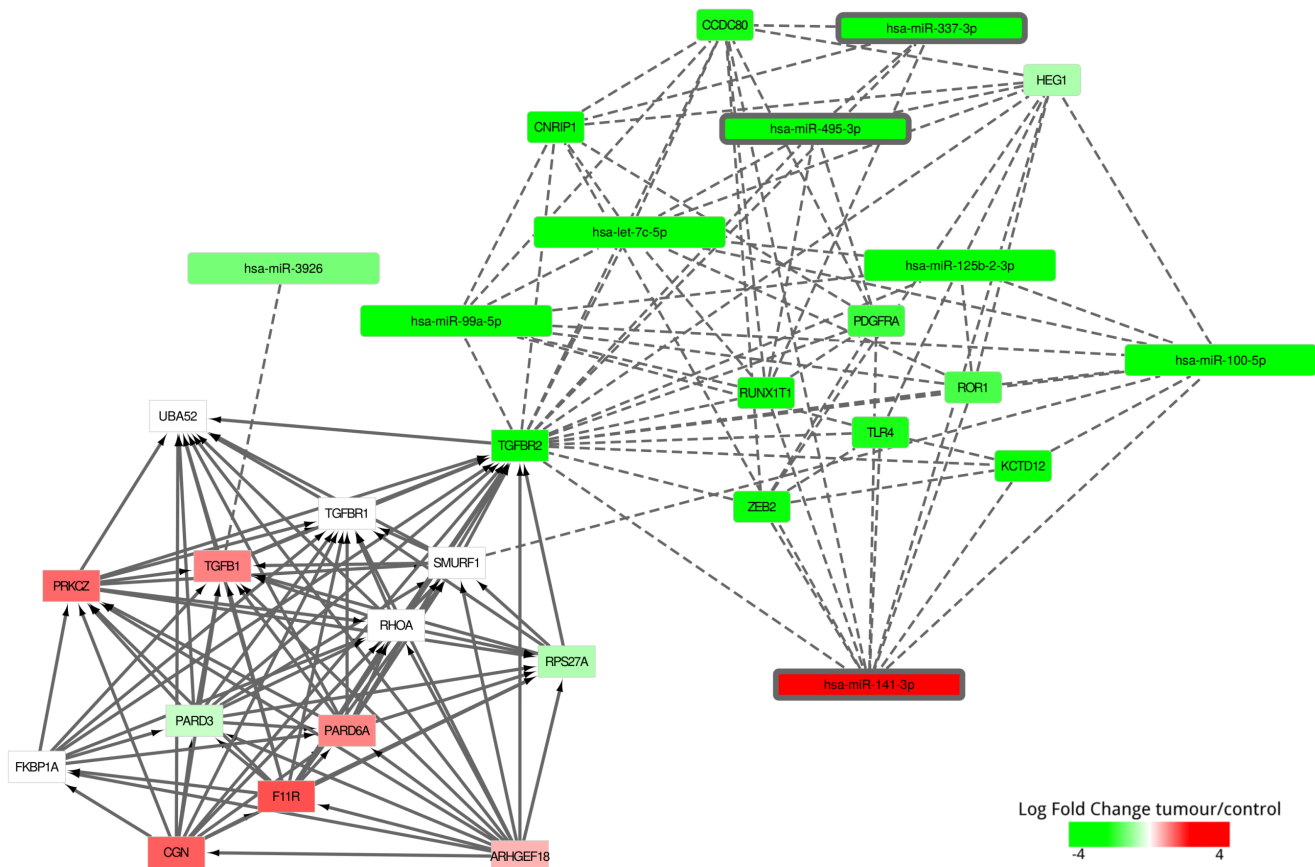

**Figure S11.** Network visualization of the Reactome pathway: TGF-beta receptor signaling in EMT (epithelial to mesenchymal transition). First neighbours of the nodes in the network inferred from tumour data (miR and mRNA) that matched nodes (genes) in the pathway were added to the visualization. Thick solid stroke edges belong to the pathway; dashed edges correspond to tumour data inferred network associations. miRNAs from the miR-200 family and the DLK1-DIO3 cluster are highlighted with thicker border.

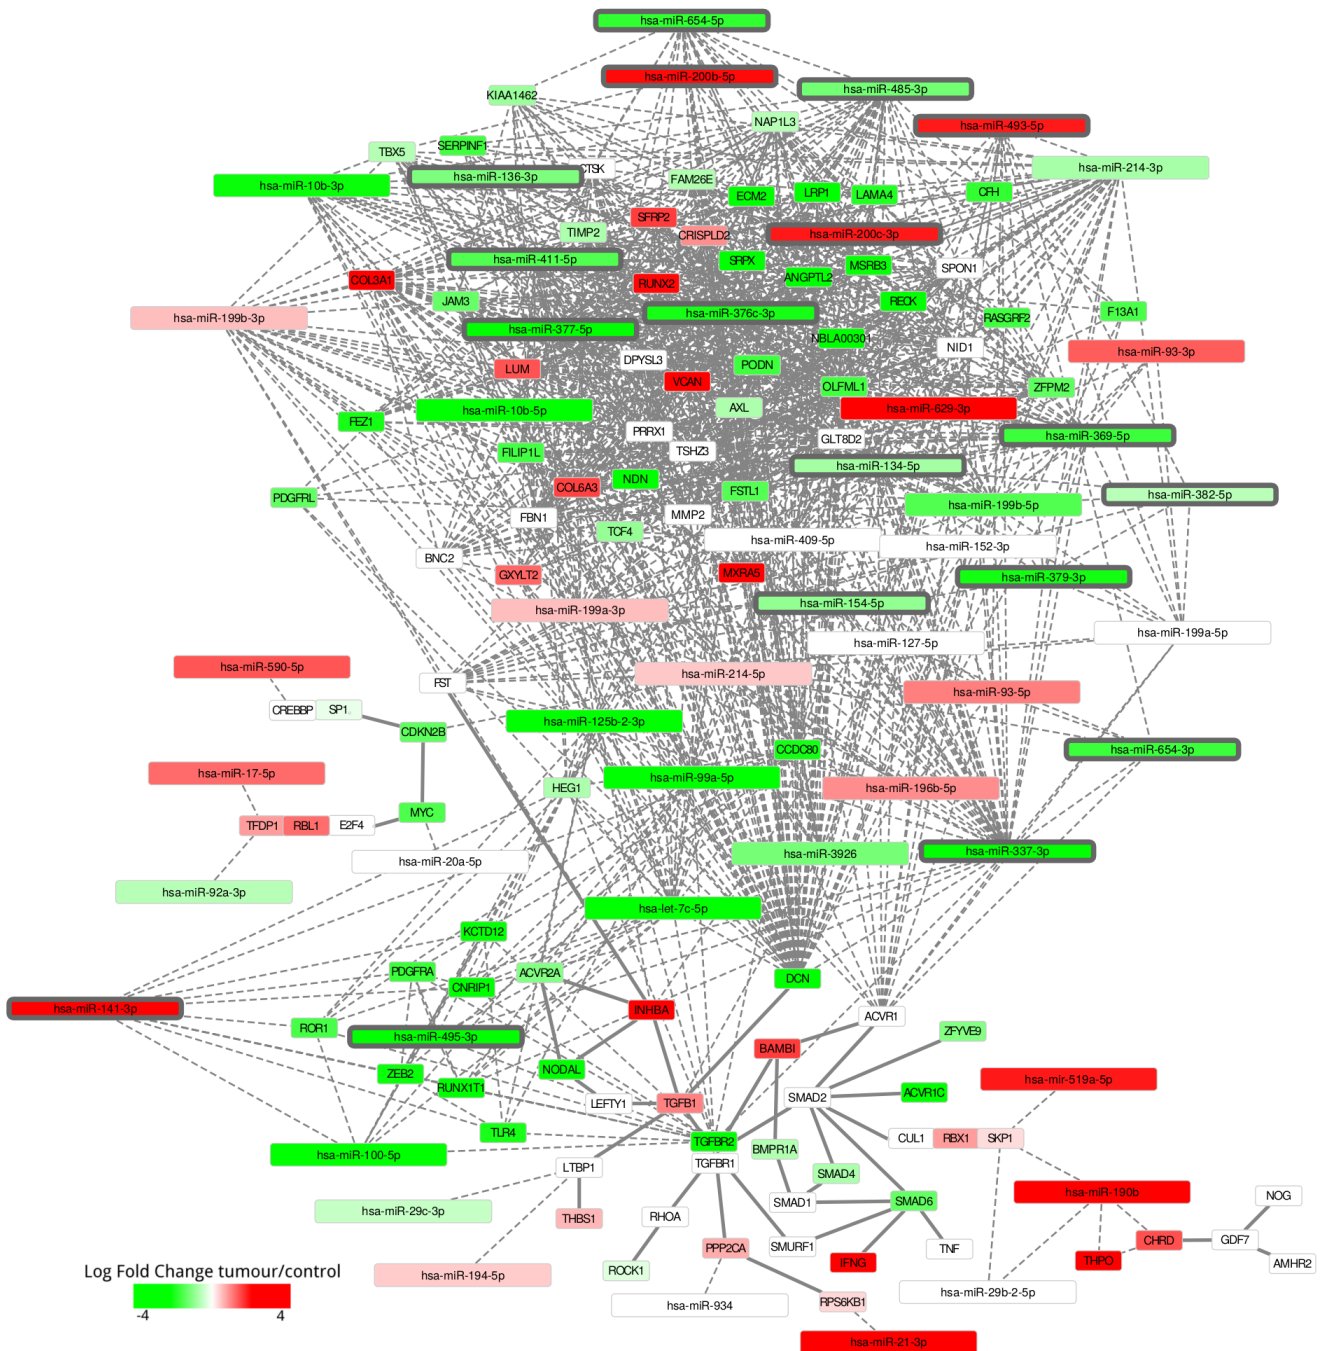

**Figure S12.** Network visualization of the KEGG pathway: TGF-beta signaling. First neighbours of the nodes in the network inferred from tumour data (miR and mRNA) that matched nodes (genes) in the pathway were added to the visualization. Thick solid stroke edges belong to the pathway; dashed edges correspond to tumour data inferred network associations. miRNAs from the miR-200 family and the DLK1-DIO3 cluster are highlighted with thicker border.





Table S17. Information about the node and edge intersection between the networks inferred from the tumour and control data and the experimentally validated interactions from miRTarBase and the miR-target prediction database TargetScan (**Nodes** make reference to the genes that are present in both the inferred networks and the corresponding database. **Nodes w/edges** are the number of genes from **Nodes** with edges in the inferred network that correspond to a predicted or validated interaction). **Common edges** make reference to the edges that are present both at our inferred network and the databases (TargetScan and miRTarBase).

| Control       |       |               |       | Tumour        |       |               |       |
|---------------|-------|---------------|-------|---------------|-------|---------------|-------|
| miRTarBase    |       | TargetScan    |       | miRTarBase    |       | TargetScan    |       |
| Nodes         | 2,987 | Nodes         | 2,330 | Nodes         | 3,484 | Nodes         | 2,692 |
| Nodes w/edges | 189   | Nodes w/edges | 239   | Nodes w/edges | 263   | Nodes w/edges | 250   |
| Common edges  | 186   | Common edges  | 298   | Common edges  | 202   | Common edges  | 243   |

Table S18. Information about the node and edge intersection between the miR-200 first neighbour networks inferred from the tumour and control data and the experimentally validated interactions from miRTarBase and the miR-target prediction database TargetScan (**Nodes** make reference to the genes that are present in both the inferred networks and the corresponding database. **Nodes w/edges** are the number of genes from **Nodes** with edges in the inferred network that correspond to a predicted or validated interaction). **Common edges** make reference to the edges that are present both at our inferred network and the databases (TargetScan and miRTarBase).

| Control       |    |               |     | Tumour        |   |               |    |
|---------------|----|---------------|-----|---------------|---|---------------|----|
| miRTarBase    |    | TargetScan    |     | miRTarBase    |   | TargetScan    |    |
| Nodes w/edges | 48 | Nodes w/edges | 140 | Nodes w/edges | 8 | Nodes w/edges | 30 |
| Common edges  | 57 | Common edges  | 203 | Common edges  | 5 | Common edges  | 30 |

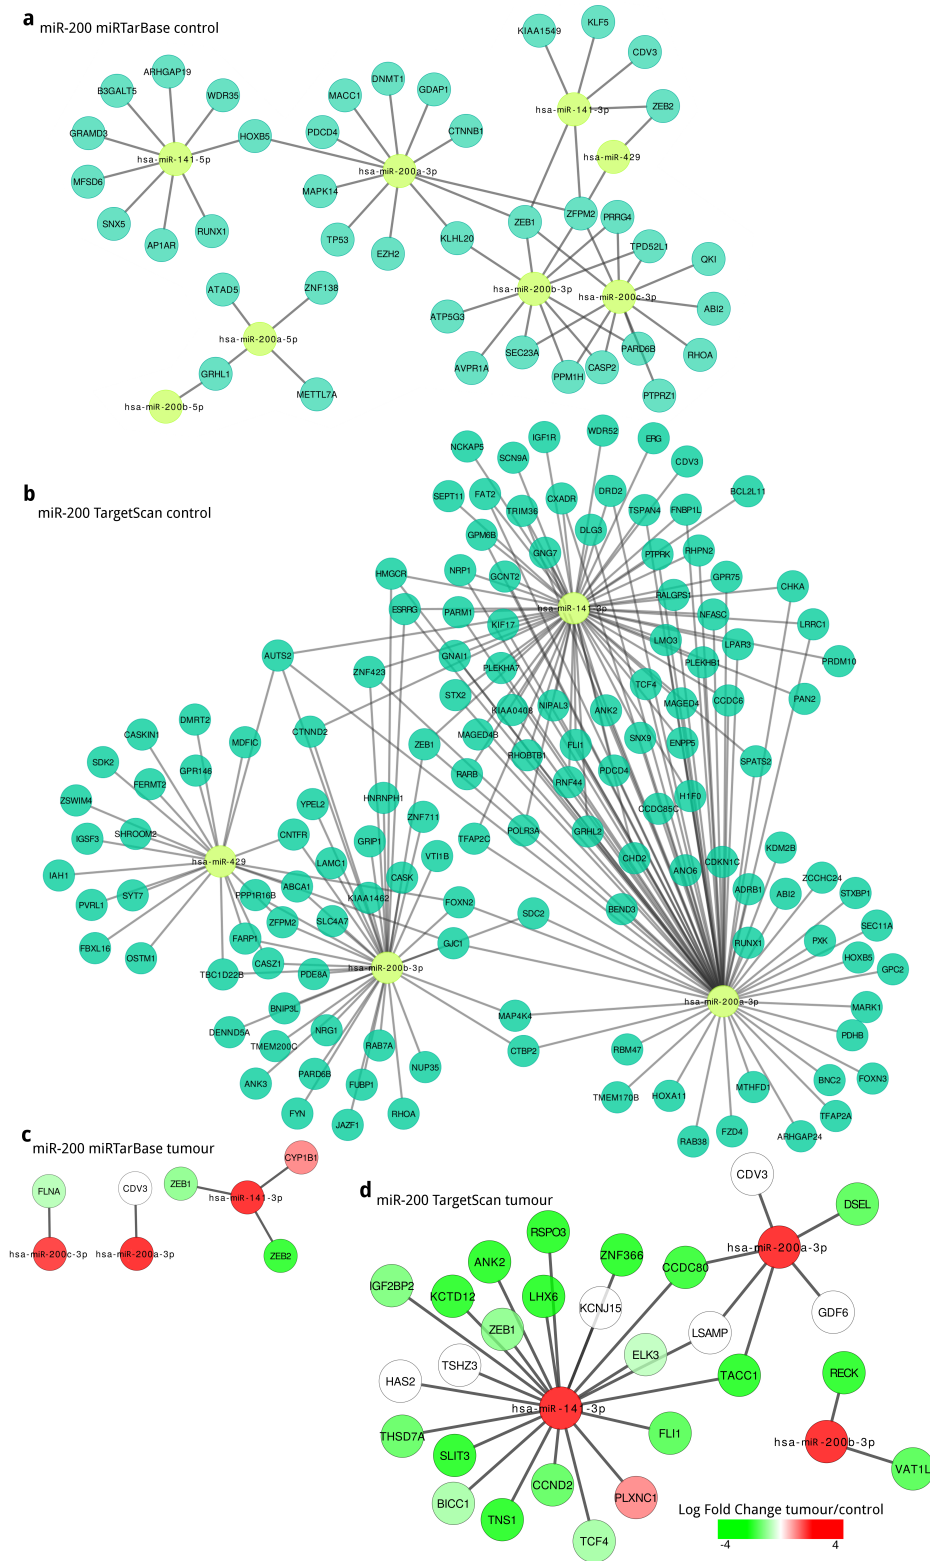

**Figure S14.** Visualization of the nodes and edges related to miR-200 from the networks inferred from tumour and control samples that match a experimentally validated or predicted miR-target association. The experimentally validated interactions were obtained from miRTarBase, and the predicted miR-target associations were collected from TargetScan. The Tumour networks are coloured by their differential expression.



## Supplementary methods

### Network construction

We constructed networks with different  $p$ -value thresholds to test the susceptibility of the edge inference to this threshold. We found that networks with the same (Supplementary Tables S21 and S22) or different numbers of miR and mRNA edges (at least in two orders of magnitude; Supplementary Tables S23 and S24) have similar network attributes, and disintegration property when miR nodes were removed from the network remains (Supplementary Tables S21-S24). We also determined the top ten degree ranked nodes for each network (Supplementary Tables S25-S28) and found that miR-200 and miR-199 family members remain present as high degree ranked nodes. It is worth noting that even with shifting the thresholds such that the number of edges for miRs and mRNAs are the same, miRs retain their high degree rank.

The  $p$ -value thresholds were also modified such that the same number of miR-miR and miR-mRNA edges was the same as the number of mRNA-mRNA edges. These were selected to match the original number of miR-miR and miR-mRNA edges (25,334 edges; i.e. the mRNA-mRNA edges threshold was changed to 99.978%ile; Supplementary Table S21), and the original number of mRNA-mRNA edges (14,892; i.e. the miR-miR and miR-mRNA edge threshold was changed to 99.848%ile; Supplementary Table S22). Also, to test the robustness of our observations to the chosen thresholds, we constructed networks where these numbers varied by an order of magnitude; both with a decrease (miR edges = 2,533; mRNA edges = 1,489; Supplementary Table S23) and an increase (miR edges = 253,340; mRNA edges = 148,920; Supplementary Table S24). As shown (Supplementary Tables S25-S28), networks with different cut-offs show similar attributes and behaviours to the network reported within the results.

Table S21. Attributes of a variation of the Networks inferred from control and tumour data. The presented networks were constructed adjusting the original mRNA  $p$ -value threshold to correspond an initial equal amount of miRs and mRNAs edges (Lc: Largest Component).

| Attribute          | Whole network |        | Largest component |        | Lc mRNA-mRNA subnetwork |        |
|--------------------|---------------|--------|-------------------|--------|-------------------------|--------|
|                    | Control       | Tumour | Control           | Tumour | Control                 | Tumour |
| Total nodes        | 5,000         | 4,966  | 4,624             | 4,375  | 4,501                   | 3,888  |
| miR                | 241           | 514    | 123               | 487    | 0                       | 0      |
| mRNA               | 4,759         | 4,452  | 4,501             | 3,888  | 4,501                   | 3,888  |
| Total interactions | 41,572        | 33,186 | 41,036            | 32,747 | 24,127                  | 16,106 |
| miR-miR            | 482           | 1,775  | 230               | 1,769  | 0                       | 0      |
| mRNA-miR           | 16,777        | 14,908 | 16,679            | 14,872 | 0                       | 0      |
| mRNA-mRNA          | 24,313        | 16,503 | 24,127            | 16,106 | 24,127                  | 16,106 |
| Components         | 102           | 241    | 1                 | 1      | 1,489                   | 2,325  |
| Single nodes       | 0             | 0      | 0                 | 0      | 1,449                   | 2,238  |

Table S22. Attributes of a variation of the Networks inferred from control and tumour data. The presented networks were constructed adjusting the original miR  $p$ -value threshold to correspond an initial equal amount of miRs and mRNAs edges (Lc: Largest Component).

| Attribute          | Whole network |        | Largest component |        | Lc mRNA-mRNA subnetwork |        |
|--------------------|---------------|--------|-------------------|--------|-------------------------|--------|
|                    | Control       | Tumour | Control           | Tumour | Control                 | Tumour |
| Total nodes        | 3,875         | 3,363  | 3,501             | 2,855  | 3,419                   | 2,461  |
| miR                | 202           | 455    | 82                | 394    | 0                       | 0      |
| mRNA               | 3,673         | 2,908  | 3,419             | 2,461  | 3,419                   | 2,461  |
| Total interactions | 25,905        | 21,231 | 25,502            | 20,874 | 14,476                  | 10,964 |
| miR-miR            | 327           | 1,174  | 155               | 1,140  | 0                       | 0      |
| mRNA-miR           | 10,941        | 8,819  | 10,871            | 8,770  | 0                       | 0      |
| mRNA-mRNA          | 14,637        | 11,238 | 14,476            | 10,964 | 14,476                  | 10,964 |
| Components         | 122           | 204    | 1                 | 1      | 1,189                   | 1,379  |
| Single nodes       | 0             | 0      | 0                 | 0      | 1,157                   | 1,338  |

Table S23. Attributes of a variation of the Networks inferred from control and tumour data. The presented networks were constructed adjusting the original  $p$ -value thresholds that corresponds to a decrease of an order of magnitude of the miRs and mRNAs edge number (Lc: Largest Component).

| Attribute          | Whole network |        | Largest component |        | Lc mRNA-mRNA subnetwork |        |
|--------------------|---------------|--------|-------------------|--------|-------------------------|--------|
|                    | Control       | Tumour | Control           | Tumour | Control                 | Tumour |
| Total nodes        | 1,096         | 1,036  | 823               | 682    | 794                     | 610    |
| miR                | 89            | 250    | 29                | 72     | 0                       | 0      |
| mRNA               | 1,007         | 786    | 794               | 610    | 794                     | 610    |
| Total interactions | 3,897         | 3,566  | 3,651             | 3,191  | 1,315                   | 1,362  |
| miR-miR            | 103           | 310    | 52                | 158    | 0                       | 0      |
| mRNA-miR           | 2,304         | 1,770  | 2,284             | 1,671  | 0                       | 0      |
| mRNA-mRNA          | 1,490         | 1,486  | 1,315             | 1,362  | 1,315                   | 1,362  |
| Components         | 84            | 108    | 1                 | 1      | 480                     | 380    |
| Single nodes       | 0             | 0      | 0                 | 0      | 460                     | 372    |

Table S24. Attributes of a variation of the Networks inferred from control and tumour data. The presented networks were constructed adjusting the original  $p$ -value thresholds that corresponds to an increase of an order of magnitude of the miRs and mRNAs edge number (Lc: Largest Component).

| Attribute          | Whole network |         | Largest component |         | Lc mRNA-mRNA subnetwork |        |
|--------------------|---------------|---------|-------------------|---------|-------------------------|--------|
|                    | Control       | Tumour  | Control           | Tumour  | Control                 | Tumour |
| Total nodes        | 10,538        | 15,428  | 10,439            | 15,422  | 9,925                   | 14,789 |
| miR                | 519           | 514     | 514               | 633     | 0                       | 0      |
| mRNA               | 10,019        | 14,795  | 9,925             | 14,789  | 9,925                   | 14,789 |
| Total interactions | 229,249       | 251,726 | 229,192           | 251,723 | 121,354                 | 65,051 |
| miR-miR            | 3,588         | 8,934   | 3,587             | 8,934   | 0                       | 0      |
| mRNA-miR           | 104,254       | 177,741 | 104,251           | 177,741 | 0                       | 0      |
| mRNA-mRNA          | 121,407       | 65,051  | 121,354           | 65,048  | 121,354                 | 65,048 |
| Components         | 43            | 4       | 1                 | 1       | 3,646                   | 7,404  |
| Single nodes       | 0             | 0       | 0                 | 0       | 3,569                   | 7,077  |

Table S25. Top ten high degree nodes in a variation of the networks inferred from control and tumour data; constructed adjusting the original mRNA  $p$ -value threshold to correspond an initial equal amount of miRs and mRNAs edges.

| Control         |        | Tumours         |        |
|-----------------|--------|-----------------|--------|
| Node            | Degree | Node            | Degree |
| hsa-mir-200b-3p | 1,272  | hsa-let-7c-5p   | 445    |
| hsa-mir-200a-3p | 1,247  | hsa-mir-199b-5p | 435    |
| hsa-mir-141-5p  | 1,192  | hsa-mir-199a-5p | 433    |
| hsa-mir-141-3p  | 1,170  | hsa-mir-337-3p  | 387    |
| hsa-mir-193b-5p | 1,025  | hsa-mir-99a-5p  | 366    |
| hsa-mir-200a-5p | 1,002  | hsa-mir-134-5p  | 299    |
| hsa-mir-200c-3p | 997    | hsa-mir-382-5p  | 293    |
| hsa-mir-22-3p   | 681    | hsa-let-7i-3p   | 267    |
| hsa-mir-652-3p  | 640    | hsa-mir-199a-3p | 262    |
| hsa-mir-200c-5p | 625    | hsa-mir-199b-3p | 260    |

Table S26. Top ten high degree nodes in a variation of the networks inferred from control and tumour data; constructed adjusting the original miR  $p$ -value threshold to correspond an initial equal amount of miRs and mRNAs edges..

| <b>Control</b>  |        | <b>Tumour</b>   |        |
|-----------------|--------|-----------------|--------|
| Node            | Degree | Node            | Degree |
| hsa-mir-200a-3p | 972    | hsa-mir-199b-5p | 327    |
| hsa-mir-200b-3p | 955    | hsa-mir-199a-5p | 327    |
| hsa-mir-141-5p  | 949    | hsa-mir-337-3p  | 319    |
| hsa-mir-141-3p  | 875    | hsa-let-7c-5p   | 311    |
| hsa-mir-200a-5p | 723    | hsa-mir-99a-5p  | 256    |
| hsa-mir-193b-5p | 691    | hsa-mir-134-5p  | 238    |
| hsa-mir-200c-3p | 641    | hsa-mir-199a-3p | 234    |
| hsa-mir-22-3p   | 496    | hsa-mir-199b-3p | 233    |
| hsa-mir-652-3p  | 456    | hsa-mir-223-3p  | 214    |
| hsa-mir-378a-5p | 399    | hsa-mir-150-5p  | 203    |

Table S27. Top ten high degree nodes in a variation of the networks inferred from control and tumour data; constructed adjusting the original  $p$ -value thresholds that corresponds to a decrease of an order of magnitude of the miRs and mRNAs edge number.

| <b>Control</b>  |        | <b>Tumour</b>   |        |
|-----------------|--------|-----------------|--------|
| Node            | Degree | Node            | Degree |
| hsa-mir-200a-3p | 231    | hsa-mir-150-5p  | 181    |
| hsa-mir-224-5p  | 215    | hsa-mir-142-5p  | 145    |
| hsa-mir-652-3p  | 213    | hsa-mir-155-5p  | 126    |
| hsa-mir-141-5p  | 198    | hsa-mir-199a-3p | 111    |
| hsa-mir-200b-3p | 197    | hsa-mir-199b-3p | 110    |
| hsa-mir-141-3p  | 191    | hsa-mir-146a-5p | 103    |
| hsa-mir-452-5p  | 160    | hsa-mir-134-5p  | 99     |
| hsa-mir-378a-5p | 148    | hsa-mir-199b-5p | 95     |
| hsa-mir-200a-5p | 120    | hsa-mir-199a-5p | 93     |
| hsa-mir-224-3p  | 86     | hsa-mir-337-3p  | 87     |

Table S28. Top ten high degree nodes in a variation of the networks inferred from control and tumour data; constructed adjusting the original  $p$ -value thresholds that corresponds to an increase of an order of magnitude of the miRs and mRNAs edge number.

| <b>Control</b>  |        | <b>Tumour</b>    |        |
|-----------------|--------|------------------|--------|
| Node            | Degree | Node             | Degree |
| hsa-mir-193b-5p | 2,563  | hsa-mir-190b     | 1,771  |
| hsa-mir-200a-3p | 2,469  | hsa-mir-199a-5p  | 1,668  |
| hsa-mir-200b-3p | 2,408  | hsa-mir-29b-2-5p | 1,590  |
| hsa-mir-141-5p  | 2,379  | hsa-mir-199b-5p  | 1,475  |
| hsa-mir-200c-3p | 2,348  | hsa-mir-337-3p   | 1,392  |
| hsa-mir-141-3p  | 2,280  | hsa-mir-18a-3p   | 1,370  |
| hsa-mir-200a-5p | 2,260  | hsa-mir-452-3p   | 1,306  |
| hsa-mir-200c-5p | 2,193  | hsa-mir-382-5p   | 1,246  |
| hsa-mir-652-3p  | 2,014  | hsa-mir-18a-5p   | 1,228  |
| hsa-mir-146b-5p | 1,984  | hsa-mir-29c-5p   | 1,173  |
